# Supplementary material for: Tolerance of Plasmodium falciparum mefloquine-resistant clinical isolates to mefloquine-piperaquine: implications for triple artemisinin-based combination therapy strategies.
Source: Research Square preprint supplement (doi:10.21203/rs.3.rs-6629488/v1), 2025-05-23
Supplement: Supplementary file 1 [file ff7db5817da84f63723ae9e4.docx]

**SUPPLEMENTARY APPENDIX**

**Supplementary Figure 1*.* Treatment and parasitological history of the patient infected by the strain 9097.**


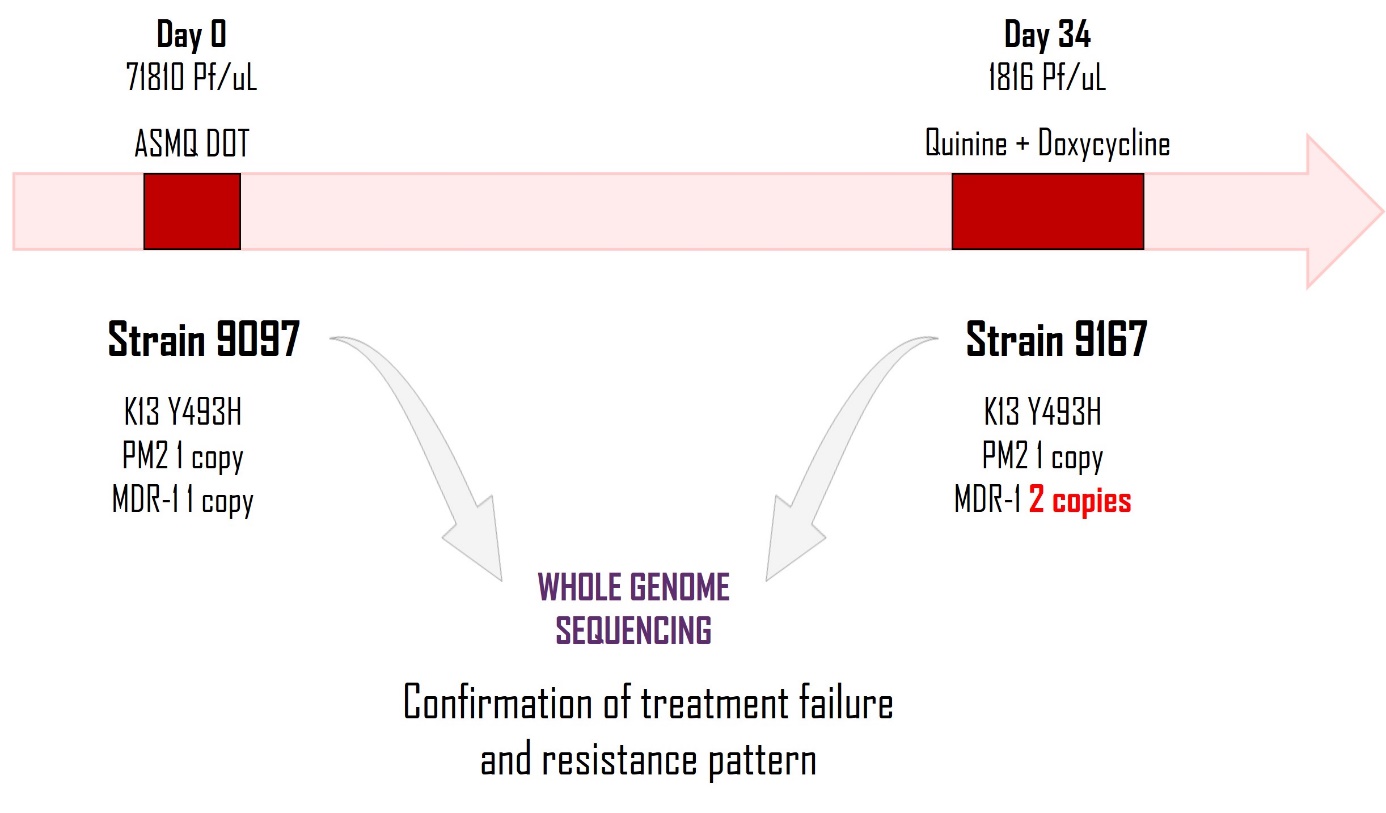


**Supplementary Figure 2*.* Summary of pressure experiment.**
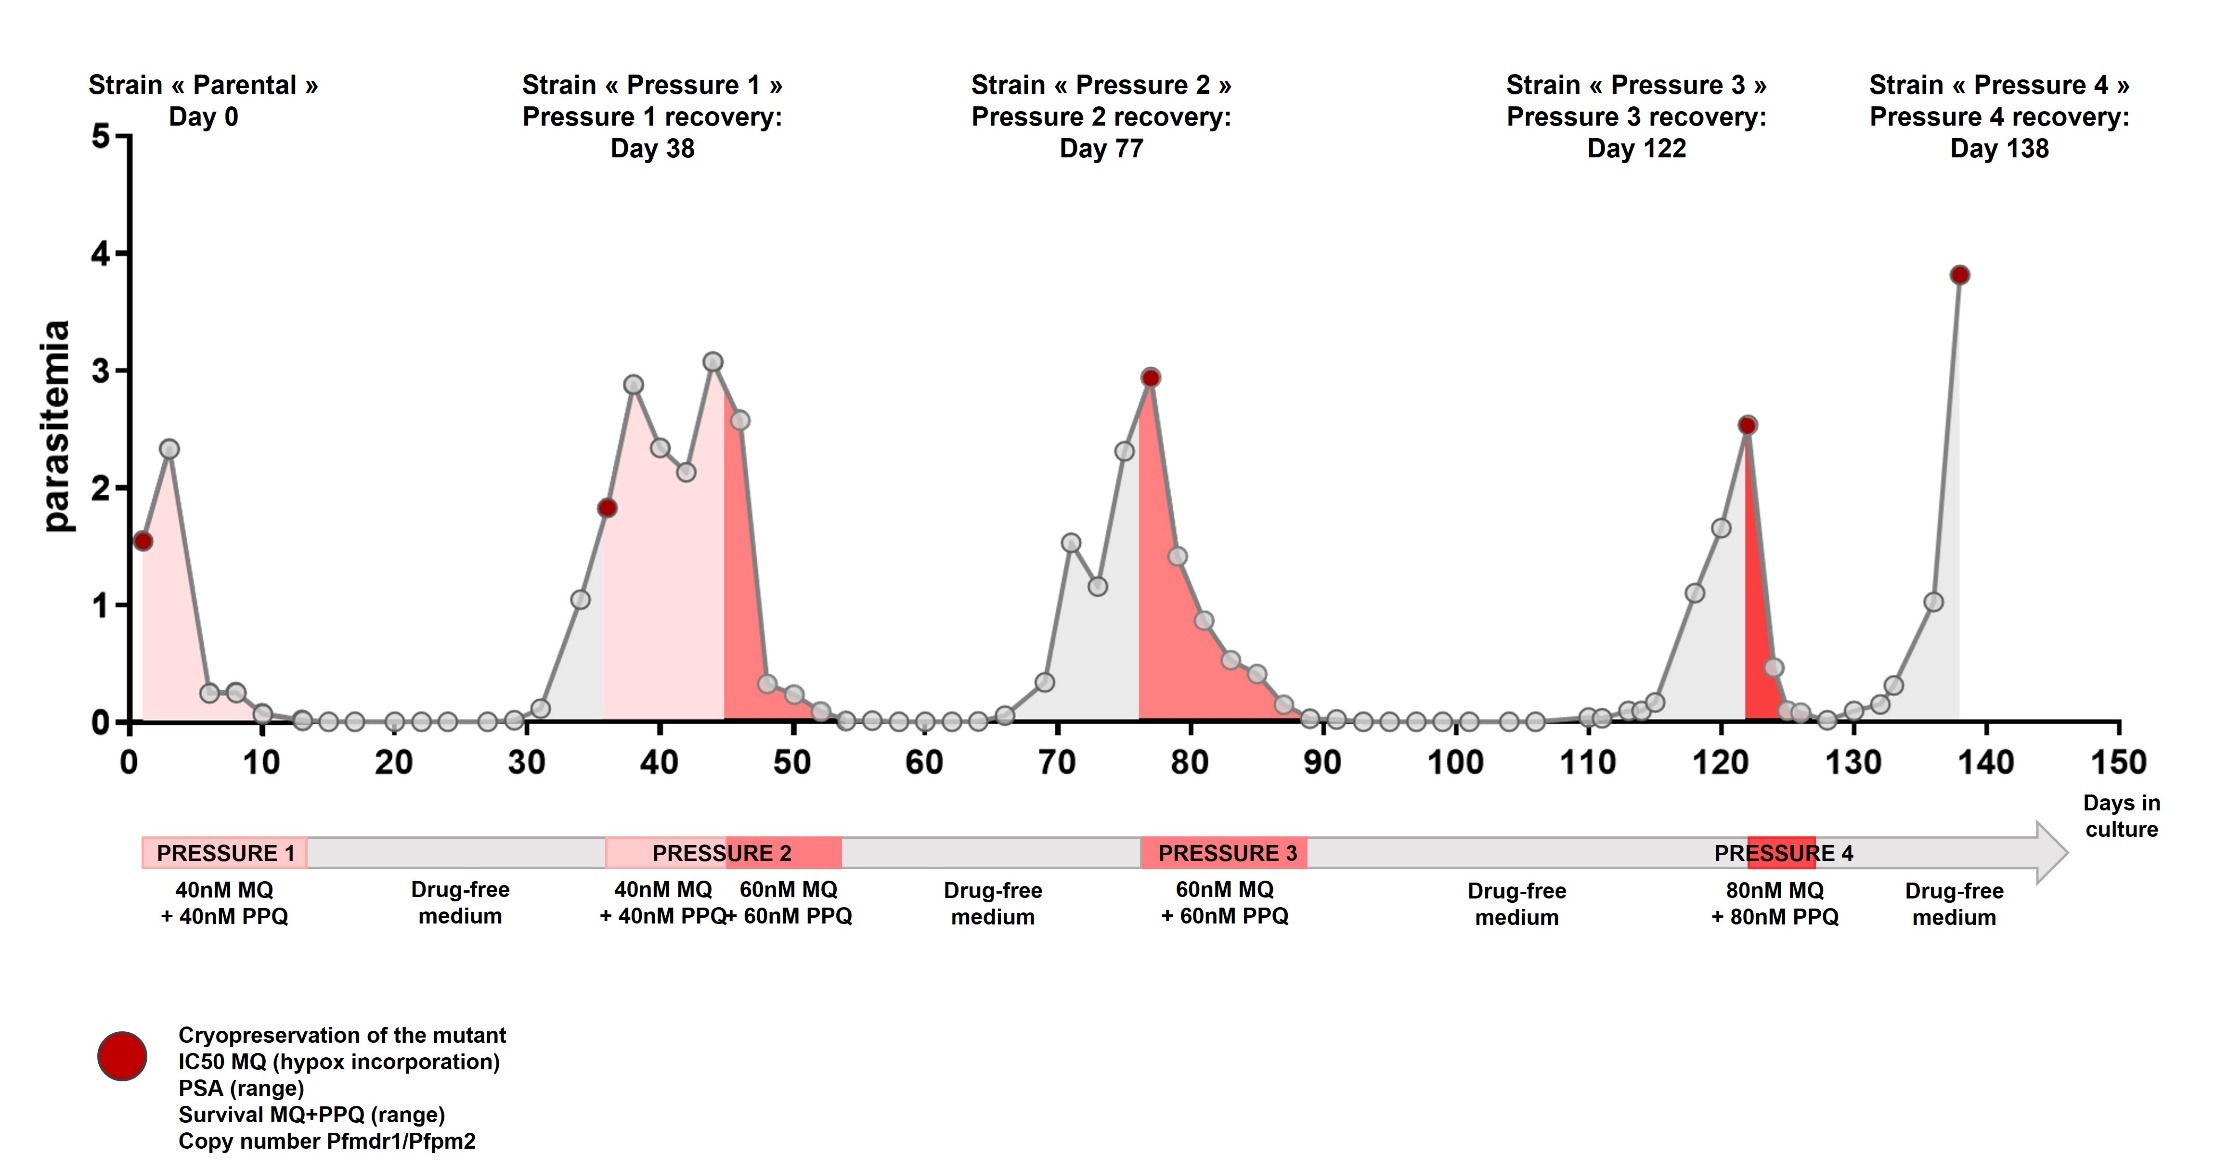


**Supplementary Figure 3. Evolution of the *in vitro* susceptibility of the parent strain and the selected strain after continuous pressure of MQ+PPQ, measured by conventional methods.** Mean and standard deviation are represented on the graphs and each dot represents one independent replicate. Mann-Whitney *U* test was used as statistical test.

**A.** Mefloquine susceptibility evolution. The susceptibility to mefloquine was measured using incorporation of 3H-hypoxanthine and IC50s were calculated (** *p* = 0.0040). **B.** Piperaquine susceptibility evolution. The susceptibility to piperaquine was determined using PSA. A significant increase was observed between the two strains, but PSA remains below the threshold of resistance (** *p* = 0.0068).


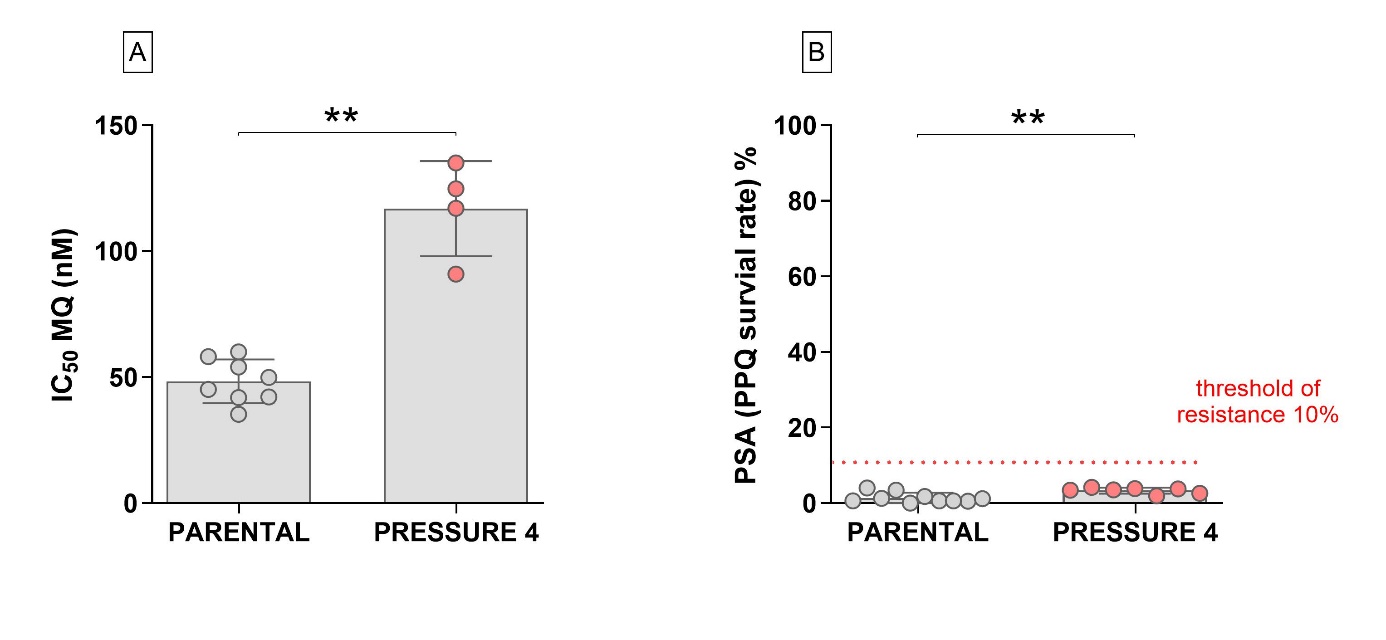


**Supplementary Figure 4. Number of (A) SNPs and (B) indels detected between the two studied strains (*Parental* and *Pressure 4* strains).** The plots report the number of genomic positions retained after each filtering step.


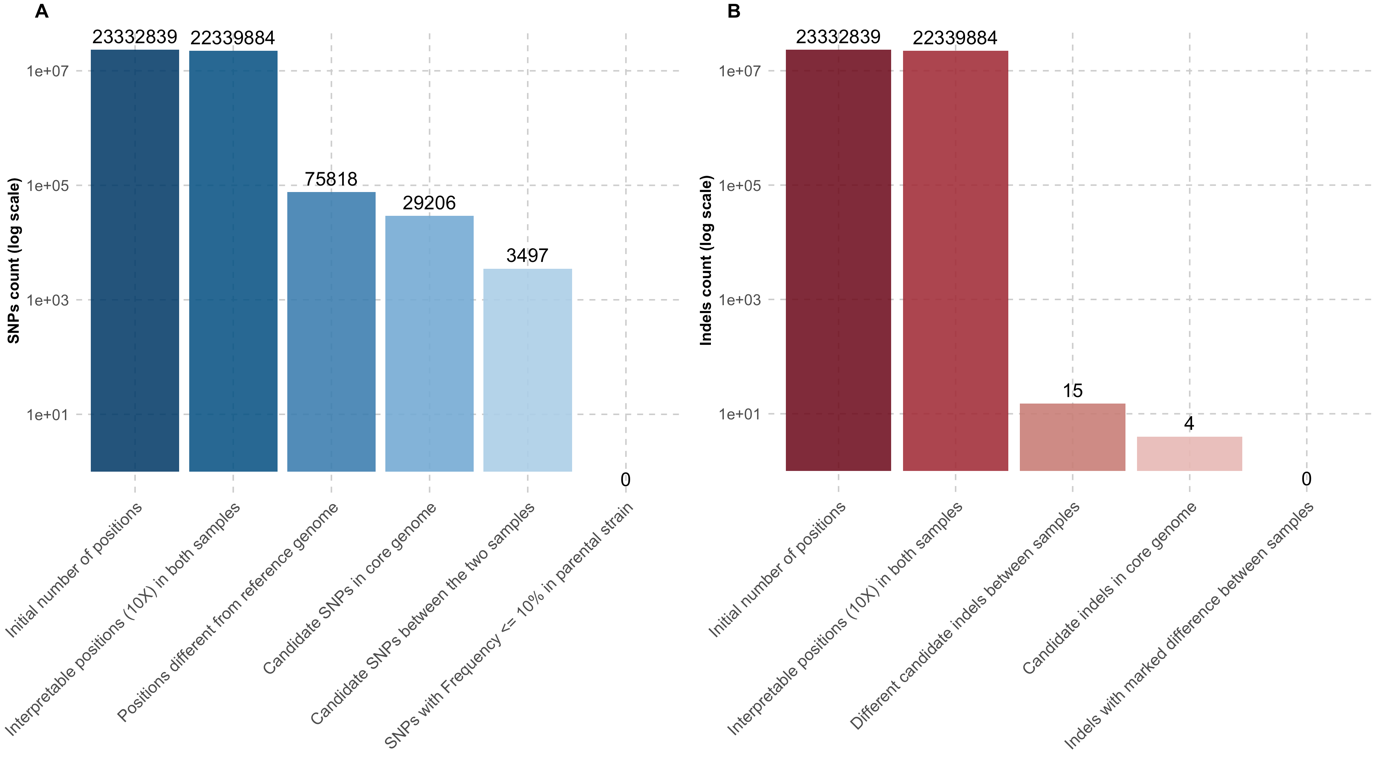


**Supplementary Table 1. Characteristics and *in vitro* results of samples selected.**

| **Strain** | **Category** | **Year** | **Province** | **K13** | **PfPm2 copy number** | **Pfmdr-1 copy number** | **CRT 88** | **CRT 93** | **CRT 97** | **CRT 145** | **CRT 218** | **CRT 343** | **CRT 353** | **IC50 MQ (nM)** | **PSA (%)** | **IC50 MQ+PPQ coexposure (nM)** |
| --- | --- | --- | --- | --- | --- | --- | --- | --- | --- | --- | --- | --- | --- | --- | --- | --- |
| **7742** | KEL1/PLA1 | 2016 | Mondulkiri | C580Y | > 1,5 | < 1,5 | N | T | H | F | I | M | G | 8,55 | 80,55 | 25,73 |
| **8197** | KEL1/PLA1 | 2017 | Mondulkiri | C580Y | > 1,5 | < 1,5 | N | T | H | I | I | M | G | 24,37 | 66,37 | 23,94 |
| **8286** | KEL1/PLA1 | 2017 | Pursat | C580Y | > 1,5 | < 1,5 | N | S | H | F | I | M | G | 9,82 | 64,64 | 10,98 |
| **8315** | KEL1/PLA1 | 2017 | Rattanakiri | C580Y | > 1,5 | < 1,5 | K | T | H | F | I | M | G | 24,87 | 42,85 | 30,74 |
| **8546** | KEL1/PLA1 | 2018 | Kampong Speu | C580Y | > 1,5 | < 1,5 | N | T | Y | F | I | M | G | 50,82 | 27,50 | 31,84 |
| **9025** | KEL1/PLA1 | 2019 | Kampong Speu | C580Y | > 1,5 | < 1,5 | N | T | Y | F | I | M | G | 40,65 | 57,40 | 14,88 |
| **9028** | KEL1/PLA1 | 2019 | Pursat | C580Y | > 1,5 | < 1,5 | N | T | Y | F | I | M | G | 30,55 | 46,16 | 17,97 |
| **9034** | KEL1/PLA1 | 2019 | Pursat | C580Y | > 1,5 | < 1,5 | N | T | Y | F | I | M | G | 34,8 | 64,18 | 33,59 |
| **9074** | KEL1/PLA1 | 2019 | Kampong Speu | C580Y | > 1,5 | < 1,5 | N | T | Y | F | I | M | G | 48,32 | 50,56 | 28,90 |
| **8916** | MQ-R | 2018 | Rattanakiri | R539T | < 1,5 | > 1,5 | N | T | H | F | I | M | G | 107,49 | 0,01 | 63,70 |
| **9042** | MQ-R | 2019 | Rattanakiri | C580Y | < 1,5 | > 1,5 | N | T | H | F | I | M | G | 100,40 | 0,39 | 34,72 |
| **9061** | MQ-R | 2019 | Rattanakiri | C580Y | < 1,5 | > 1,5 | N | T | H | F | I | M | G | 85,96 | 0,00 | 47,20 |
| **9062** | MQ-R | 2019 | Rattanakiri | C580Y | < 1,5 | > 1,5 | N | T | H | F | I | M | G | 72,57 | 0,00 | 47,42 |
| **9065** | MQ-R | 2019 | Rattanakiri | C580Y | < 1,5 | > 1,5 | N | T | H | F | I | M | G | 105,15 | 0,00 | 28,25 |
| **9067** | MQ-R | 2019 | Rattanakiri | C580Y | < 1,5 | > 1,5 | N | T | H | F | I | M | G | 69,56 | 0,00 | 63,21 |
| **9069** | MQ-R | 2019 | Rattanakiri | C580Y | < 1,5 | > 1,5 | N | T | H | F | I | M | G | 71,20 | 0,00 | 29,06 |
| **9071** | MQ-R | 2019 | Rattanakiri | C580Y | < 1,5 | > 1,5 | N | T | H | F | I | M | G | 93,69 | 0,00 | 52,52 |
| **9077** | MQ-R | 2019 | Rattanakiri | C580Y | < 1,5 | > 1,5 | N | T | H | F | I | M | G | 125,58 | 0,00 | 37,62 |
| **9078** | MQ-R | 2019 | Rattanakiri | C580Y | < 1,5 | > 1,5 | N | T | H | F | I | M | G | 72,81 | 0,00 | 26,38 |
| **9080** | MQ-R | 2019 | Rattanakiri | C580Y | < 1,5 | > 1,5 | N | T | H | F | I | M | G | 77,26 | 0,00 | 63,69 |
| **9081** | MQ-R | 2019 | Rattanakiri | C580Y | < 1,5 | > 1,5 | N | T | H | F | I | M | G | 89,05 | 0,18 | 57,64 |
| **9093** | MQ-R | 2019 | Kampong Speu | Y493H | < 1,5 | > 1,5 | N | T | H | F | I | M | G | 118,95 | 1,41 | 67,58 |
| **9099** | MQ-R | 2019 | Rattanakiri | C580Y | < 1,5 | > 1,5 | N | T | H | F | I | M | G | 147,89 | 0,00 | 54,92 |
| **9128** | MQ-R | 2019 | Kampong Speu | Y493H | < 1,5 | > 1,5 | N | T | H | F | I | M | G | 126,47 | 0,00 | 83,84 |
| **9167** | MQ-R | 2019 | Pursat | Y493H | < 1,5 | > 1,5 | N | T | H | F | I | M | G | 90,36 | 0,00 | 46,51 |
| **9175** | MQ-R | 2019 | Pursat | Y493H | < 1,5 | > 1,5 | N | T | H | F | I | M | G | 83,61 | 0,70 | 67,23 |
| **8944** | Sensitive | 2018 | Rattanakiri | WT | < 1,5 | < 1,5 | N | T | H | F | I | M | G | 20,77 | 0,00 | 23,70 |
| **9032** | Sensitive | 2019 | Rattanakiri | WT | < 1,5 | < 1,5 | N | T | H | F | I | M | G | 51,95 | 0,00 | 23,60 |
| **9037** | Sensitive | 2019 | Rattanakiri | WT | < 1,5 | < 1,5 | N | T | H | F | I | M | G | 54,68 | 0,00 | 20,26 |
| **9046** | Sensitive | 2019 | Rattanakiri | WT | < 1,5 | < 1,5 | N | T | H | F | I | M | G | 35,39 | 0,00 | 21,11 |
| **9049** | Sensitive | 2019 | Rattanakiri | WT | < 1,5 | < 1,5 | N | T | H | F | I | M | G | 52,15 | 0,00 | 27,32 |
| **9097** | PARENTAL | 2019 | Pursat | Y493H | < 1,5 | < 1,5 | N | T | H | F | I | M | G | 49,05 | 2,49 | 21,70 |

**Supplementary Table 2. List of amplified and deleted genes in Pressure 4 strain.**

| **Gene_ID** | **F75**  **strain** | **F78**  **strain** | **Differential** | **Gene description** | **Chromosome** | **Result** |
| --- | --- | --- | --- | --- | --- | --- |
| PF3D7_0522000 | 0,51 | 1,18 | 0,67 | Uncharacterized protein | PF3D7_05 | Amplified |
| PF3D7_0519500 | 1,06 | 1,76 | 0,7 | poly(A)-specific ribonuclease | PF3D7_05 | Amplified |
| PF3D7_0522300 | 0,69 | 1,45 | 0,76 | 18S rRNA (Guanine-N(7))-methyltransferase, putative | PF3D7_05 | Amplified |
| PF3D7_0522200 | 0,78 | 1,55 | 0,77 | Transcription initiation factor TFIID subunit 10, putative | PF3D7_05 | Amplified |
| PF3D7_0522700 | 0,71 | 1,5 | 0,79 | Iron-sulfur cluster assembly protein SufA | PF3D7_05 | Amplified |
| PF3D7_0522500 | 0,68 | 1,48 | 0,8 | 50S ribosomal protein L17, apicoplast, putative | PF3D7_05 | Amplified |
| PF3D7_0520600 | 0,91 | 1,72 | 0,81 | Bis(5'-nucleosyl)-tetraphosphatase [asymmetrical] | PF3D7_05 | Amplified |
| PF3D7_0520000 | 0,56 | 1,38 | 0,82 | 40S ribosomal protein S9, putative | PF3D7_05 | Amplified |
| PF3D7_0523100 | 1,06 | 1,88 | 0,82 | Alpha-MPP | PF3D7_05 | Amplified |
| PF3D7_0522800 | 0,91 | 1,77 | 0,86 | Pre-mRNA-splicing factor BUD31, putative | PF3D7_05 | Amplified |
| PF3D7_0522900 | 1,19 | 2,09 | 0,9 | Zinc finger protein, putative | PF3D7_05 | Amplified |
| PF3D7_0521500 | 1,06 | 2,02 | 0,96 | Ribosomal large subunit pseudouridylate synthase, putative | PF3D7_05 | Amplified |
| PF3D7_0523200 | 1,03 | 2,02 | 0,99 | Heptatricopeptide repeat-containing protein, putative | PF3D7_05 | Amplified |
| PF3D7_0520700 | 1,15 | 2,14 | 0,99 | CDC73 domain-containing protein, putative | PF3D7_05 | Amplified |
| PF3D7_0519900 | 1,11 | 2,11 | 1 | Uncharacterized protein | PF3D7_05 | Amplified |
| PF3D7_0522100 | 1,07 | 2,07 | 1 | RRM domain-containing protein | PF3D7_05 | Amplified |
| PF3D7_0520100 | 0,92 | 1,92 | 1 | Protein phosphatase PPM9, putative | PF3D7_05 | Amplified |
| PF3D7_0521100 | 1,06 | 2,06 | 1 | Uncharacterized protein | PF3D7_05 | Amplified |
| PF3D7_0520500 | 0,92 | 1,93 | 1,01 | Phosphomethylpyrimidine kinase, putative | PF3D7_05 | Amplified |
| PF3D7_0521800 | 1,07 | 2,08 | 1,01 | AFG1-like ATPase, putative | PF3D7_05 | Amplified |
| PF3D7_0519700 | 0,82 | 1,83 | 1,01 | FoP domain-containing protein, putative | PF3D7_05 | Amplified |
| PF3D7_0522600 | 1,15 | 2,16 | 1,01 | Inner membrane complex protein | PF3D7_05 | Amplified |
| PF3D7_0520900 | 1,1 | 2,12 | 1,02 | Adenosylhomocysteinase | PF3D7_05 | Amplified |
| PF3D7_0521200 | 1,02 | 2,06 | 1,04 | Uncharacterized protein | PF3D7_05 | Amplified |
| PF3D7_0521300 | 1,07 | 2,12 | 1,05 | Zinc finger protein, putative | PF3D7_05 | Amplified |
| PF3D7_0519600 | 1,2 | 2,26 | 1,06 | Zinc finger protein, putative | PF3D7_05 | Amplified |
| PF3D7_0521900 | 1,16 | 2,22 | 1,06 | Uncharacterized protein | PF3D7_05 | Amplified |
| PF3D7_0522400 | 1,17 | 2,24 | 1,07 | Chorein N-terminal domain-containing protein | PF3D7_05 | Amplified |
| PF3D7_0519800 | 1,22 | 2,3 | 1,08 | EELM2 domain-containing protein, putative | PF3D7_05 | Amplified |
| PF3D7_0520400 | 1,13 | 2,21 | 1,08 | Single-stranded DNA-binding protein, putative | PF3D7_05 | Amplified |
| **PF3D7_0523000** | **1,17** | **2,25** | **1,08** | **Multidrug resistance protein 1** | **PF3D7_05** | **Amplified** |
| PF3D7_0520800 | 1,16 | 2,24 | 1,08 | Uncharacterized protein | PF3D7_05 | Amplified |
| PF3D7_0521700 | 1,11 | 2,23 | 1,12 | ATP-dependent RNA helicase | PF3D7_05 | Amplified |
| PF3D7_0520200 | 1,25 | 2,4 | 1,15 | Mediator of RNA polymerase II transcription subunit 17, putative | PF3D7_05 | Amplified |
| PF3D7_0521000 | 1,13 | 2,31 | 1,18 | Uncharacterized protein | PF3D7_05 | Amplified |
| PF3D7_0521400 | 1,1 | 2,42 | 1,32 | SUN domain-containing protein | PF3D7_05 | Amplified |
| PF3D7_0936000 | 0,57 | 0 | 0,57 | Ring-exported protein 2 | PF3D7_09 | Deleted |
| PF3D7_0935500 | 0,67 | 0 | 0,67 | Plasmodium RESA N-terminal domain-containing protein | PF3D7_09 | Deleted |
| PF3D7_0936600 | 0,74 | 0 | 0,74 | Plasmodium RESA N-terminal domain-containing protein | PF3D7_09 | Deleted |
| PF3D7_0936200 | 0,75 | 0 | 0,75 | Plasmodium RESA N-terminal domain-containing protein | PF3D7_09 | Deleted |
| PF3D7_0935400 | 1,04 | 0,25 | 0,79 | Gametocyte development protein 1 | PF3D7_09 | Deleted |
| PF3D7_0935700 | 0,86 | 0 | 0,86 | Plasmodium RESA N-terminal domain-containing protein | PF3D7_09 | Deleted |
| PF3D7_0935600 | 0,88 | 0 | 0,88 | Gametocytogenesis-implicated protein | PF3D7_09 | Deleted |
| PF3D7_0935900 | 0,88 | 0 | 0,88 | Ring-exported protein 1 | PF3D7_09 | Deleted |
| PF3D7_0936400 | 0,89 | 0 | 0,89 | Ring-exported protein 4 | PF3D7_09 | Deleted |
| PF3D7_0936800 | 0,91 | 0 | 0,91 | Plasmodium RESA N-terminal domain-containing protein | PF3D7_09 | Deleted |
| PF3D7_0935800 | 0,92 | 0 | 0,92 | Cytoadherence linked asexual protein 9 | PF3D7_09 | Deleted |
| PF3D7_0936300 | 0,93 | 0 | 0,93 | Ring-exported protein 3 | PF3D7_09 | Deleted |
| PF3D7_0936700 | 0,95 | 0 | 0,95 | Lysophospholipase, putative | PF3D7_09 | Deleted |
| PF3D7_0937000 | 0,97 | 0 | 0,97 | Plasmodium RESA N-terminal domain-containing protein | PF3D7_09 | Deleted |
| PF3D7_0937100 | 0,97 | 0 | 0,97 | Uncharacterized protein | PF3D7_09 | Deleted |
| PF3D7_0937200 | 1 | 0 | 1 | Lysophospholipase, putative | PF3D7_09 | Deleted |
| PF3D7_0936100 | 1,01 | 0 | 1,01 | Early transcribed membrane protein | PF3D7_09 | Deleted |
| PF3D7_0936500 | 1,05 | 0 | 1,05 | Virulence-associated protein 1 | PF3D7_09 | Deleted |
